# Supplementary material for: Citizen Science Tools Reveal Changes in Estuarine Water Quality Following Demolition of Buildings
Source: MDPI journal article supplement (doi:10.3390/rs13091683), 2021-04-27
Supplement: s1 [file s1]

## Data used in the analysis

Supplementary Table 1. Salinity data

| Date       | STN 1 | STN 2 | STN 3 | STN 4 | STN 5 | STN 6 | STN 7 |
|------------|-------|-------|-------|-------|-------|-------|-------|
| 20-01-2020 | 20    | 20    | 20    | 20    | 20    | 20    | ND    |
| 20-01-2020 | 20    | 20    | 20    | 20    | 20    | 20    | ND    |
| 21-01-2020 | 19    | 20    | 21    | 20    | 19    | 20    | 18    |
| 21-01-2020 | 19    | 20    | 21    | 20    | 19    | 20    | 18    |
| 22-01-2020 | 18    | 18    | 18    | 19    | 20    | 19    | 20    |
| 22-01-2020 | 18    | 18    | 18    | 19    | 20    | 19    | 20    |
| 23-01-2020 | 20    | 20    | 19    | 19    | 19    | 19    | 20    |
| 23-01-2020 | 20    | 20    | 19    | 19    | 19    | 19    | 20    |
| 24-01-2020 | 20    | 20    | 20    | 20    | 20    | 19    | 20    |
| 24-01-2020 | 20    | 20    | 20    | 20    | 20    | 19    | 20    |
| 25-01-2020 | 19    | 20    | 20    | 20    | 20    | 20    | 20    |
| 25-01-2020 | 19    | 20    | 20    | 20    | 20    | 20    | 20    |
| 26-01-2020 | 20    | 20    | 20    | 20    | 20    | 20    | 20    |
| 26-01-2020 | 20    | 20    | 20    | 20    | 20    | 20    | 20    |
| 27-01-2020 | 20    | 19    | 20    | 20    | 19    | 20    | 20    |
| 27-01-2020 | 20    | 19    | 20    | 20    | 19    | 20    | 20    |
| 31-01-2020 | 20    | 20    | 19    | 20    | 20    | 20    | 19    |
| 31-01-2020 | 20    | 20    | 19    | 20    | 20    | 20    | 19    |
| 03-02-2020 | 19    | 20    | 20    | 20    | 20    | 20    | 20    |
| 03-02-2020 | 19    | 20    | 20    | 20    | 20    | 20    | 20    |
| 06-02-2020 | 19    | 19    | 20    | 19    | 19    | 20    | 19    |
| 06-02-2020 | 19    | 19    | 20    | 19    | 19    | 20    | 19    |
| 15-02-2020 | 20    | 20    | 19    | 20    | 20    | 19    | 20    |
| 15-02-2020 | 20    | 20    | 19    | 20    | 20    | 19    | 20    |

Supplementary Table 2. Dissolved oxygen data

| Date       | STN 1 | STN 2 | STN 3 | STN 4 | STN 5 | STN 6 | STN 7 |
|------------|-------|-------|-------|-------|-------|-------|-------|
| 20-01-2020 | 2.5   | 2.6   | 2.5   | 2.26  | 3.3   | 3.09  | ND    |
| 20-01-2020 | 2.3   | 2.2   | 2.3   | 1.9   | 3.1   | 3.31  | ND    |
| 21-01-2020 | 3.28  | 2.9   | 2.91  | 3.4   | 2.49  | 4.79  | 7.8   |
| 21-01-2020 | 3.44  | 3.18  | 2.85  | 3.64  | 2.31  | 4.49  | 8.2   |
| 22-01-2020 | 3.95  | 4.08  | 3.55  | 3.87  | 3.61  | 5.89  | 9.13  |
| 22-01-2020 | 4.05  | 3.92  | 3.49  | 3.81  | 3.75  | 5.31  | 9.43  |
| 23-01-2020 | 5.17  | 4.9   | 4.36  | 3.8   | 3.55  | 3.71  | 7.29  |
| 23-01-2020 | 5.07  | 4.7   | 4.28  | 4.2   | 3.49  | 3.65  | 7.11  |
| 24-01-2020 | 4.52  | 4.21  | 4.18  | 3.92  | 4.1   | 4.17  | 6.37  |
| 24-01-2020 | 4.44  | 4.11  | 4.14  | 3.76  | 3.9   | 4.15  | 6.43  |
| 25-01-2020 | 4.69  | 3.7   | 4.49  | 4.15  | 3.91  | 4.18  | 4.03  |
| 25-01-2020 | 4.59  | 3.66  | 4.47  | 4.17  | 4.09  | 4.14  | 3.97  |

|            |      |      |      |      |      |      |      |
|------------|------|------|------|------|------|------|------|
| 26-01-2020 | 4.61 | 3.8  | 4.63 | 4.17 | 4.1  | 4.35 | 4.87 |
| 26-01-2020 | 4.67 | 3.88 | 4.33 | 4.15 | 3.9  | 4.29 | 4.73 |
| 27-01-2020 | 5.78 | 5.32 | 5.37 | 5.23 | 4.87 | 5.3  | 7.01 |
| 27-01-2020 | 5.76 | 5.28 | 5.39 | 5.19 | 4.85 | 5.28 | 7.17 |
| 31-01-2020 | 5.96 | 5.59 | 5.99 | 5.75 | 5.82 | 6.14 | 7.14 |
| 31-01-2020 | 6.02 | 5.61 | 5.91 | 5.71 | 5.86 | 6.1  | 7.1  |
| 03-02-2020 | 6.1  | 5.45 | 6.56 | 5.83 | 5.9  | 7.27 | 7.63 |
| 03-02-2020 | 6    | 5.41 | 6.54 | 5.87 | 6.1  | 7.27 | 7.61 |
| 06-02-2020 | 6.81 | 7.23 | 7.1  | 7.9  | 6.18 | 7.71 | 8.19 |
| 06-02-2020 | 6.77 | 7.19 | 7.3  | 7.92 | 6.14 | 7.67 | 8.17 |
| 15-02-2020 | ND   |
| 15-02-2020 | ND   |

Supplementary Table 3. pH data

| Date       | STN 1 | STN 2 | STN 3 | STN 4 | STN 5 | STN 6 | STN 7 |
|------------|-------|-------|-------|-------|-------|-------|-------|
| 20-01-2020 | 8.3   | 7.1   | 7.5   | 7.6   | 7.6   | 7.6   | ND    |
| 20-01-2020 | 8.3   | 7.1   | 7.5   | 7.6   | 7.6   | 7.6   | ND    |
| 21-01-2020 | 7.7   | 7.6   | 7.5   | 7.4   | 7.4   | 7.4   | 7.4   |
| 21-01-2020 | 7.7   | 7.6   | 7.5   | 7.4   | 7.4   | 7.4   | 7.4   |
| 22-01-2020 | 7.6   | 7.4   | 7.3   | 7.3   | 7.4   | 7.4   | 7.6   |
| 22-01-2020 | 7.6   | 7.4   | 7.3   | 7.3   | 7.4   | 7.4   | 7.6   |
| 23-01-2020 | 7.6   | 7.6   | 7.5   | 7.5   | 7.5   | 7.6   | 7.5   |
| 23-01-2020 | 7.6   | 7.6   | 7.5   | 7.5   | 7.5   | 7.6   | 7.5   |
| 24-01-2020 | 9.7   | 9.5   | 8.9   | 9.1   | 8.9   | 8.8   | 9.1   |
| 24-01-2020 | 9.7   | 9.5   | 8.9   | 9.1   | 8.9   | 8.8   | 9.1   |
| 25-01-2020 | 9     | 9     | 8.8   | 8.8   | 8.8   | 8.9   | 8.9   |
| 25-01-2020 | 9     | 9     | 8.8   | 8.8   | 8.8   | 8.9   | 8.9   |
| 26-01-2020 | 9     | 9.1   | 9     | 9.1   | 9.1   | 9.1   | 9.1   |
| 26-01-2020 | 9     | 9.1   | 9     | 9.1   | 9.1   | 9.1   | 9.1   |
| 27-01-2020 | 9.1   | 9.1   | 9     | 9     | 9.2   | 9     | 9.1   |
| 27-01-2020 | 9.1   | 9.1   | 9     | 9     | 9.2   | 9     | 9.1   |
| 31-01-2020 | 9.1   | 9.2   | 9.2   | 9.1   | 9.1   | 9.2   | 9.2   |
| 31-01-2020 | 9.1   | 9.2   | 9.2   | 9.1   | 9.1   | 9.2   | 9.2   |
| 03-02-2020 | 9.2   | 9     | 9.1   | 9.2   | 9.1   | 9.1   | 9     |
| 03-02-2020 | 9.2   | 9     | 9.1   | 9.2   | 9.1   | 9.1   | 9     |
| 06-02-2020 | 9.2   | 9.2   | 9     | 9     | 9.1   | 9.1   | 9.1   |
| 06-02-2020 | 9.2   | 9.2   | 9     | 9     | 9.1   | 9.1   | 9.1   |
| 15-02-2020 | 9.1   | 9     | 9     | 9.2   | 9     | 9     | 9.2   |
| 15-02-2020 | 9.1   | 9     | 9     | 9.2   | 9     | 9     | 9.2   |

Supplementary Table 4. Database obtained from the TURBAQUA application. (Actual names of the citizen scientists involved in the program has been replaced with 'CS' due to the privacy policy).

|    | <b>Citizen scientist name</b> | <b>Boat level</b> | <b>Sea level</b> | <b>secchi depth</b> | <b>Water colour</b> | <b>Latitude</b> | <b>Longitude</b> | <b>Date</b>         |
|----|-------------------------------|-------------------|------------------|---------------------|---------------------|-----------------|------------------|---------------------|
| 1  | CS                            | 1.72              | 2.49             | 0.77                | 17                  | 9.9299185       | 76.3205819       | 15-02-2020<br>17.25 |
| 2  | CS                            | 1.78              | 2.49             | 0.71                | 17                  | 9.9338385       | 76.3187577       | 15-02-2020<br>17.23 |
| 3  | CS                            | 1.52              | 2.17             | 0.65                | 16                  | 9.9351897       | 76.3150063       | 15-02-2020<br>17.17 |
| 4  | CS                            | 2.25              | 3.25             | 1                   | 15                  | 9.9429382       | 76.304219        | 15-02-2020<br>17.11 |
| 5  | CS                            | 1.82              | 2.6              | 0.78                | 15                  | 9.9356939       | 76.3152316       | 15-02-2020<br>17.07 |
| 6  | CS                            | 1.75              | 2.36             | 0.61                | 17                  | 9.9366462       | 76.3108651       | 15-02-2020<br>17.05 |
| 7  | CS                            | 2.19              | 2.92             | 0.73                | 16                  | 9.9370307       | 76.3161473       | 15-02-2020<br>17.01 |
| 8  | CS                            | 1.95              | 2.65             | 0.7                 | 17                  | 9.9275434       | 76.3177123       | 15-02-2020<br>11.22 |
| 9  | CS                            | 1.71              | 3.6              | 1.89                | 17                  | 9.9351064       | 76.3149295       | 15-02-2020<br>11.08 |
| 10 | CS                            | 2.58              | 3.62             | 1.04                | 15                  | 9.9440101       | 76.3043672       | 15-02-2020<br>10.54 |
| 11 | CS                            | 2.05              | 3.07             | 1.02                | 15                  | 9.9365099       | 76.3118044       | 15-02-2020<br>10.52 |
| 12 | CS                            | 1.97              | 2.42             | 0.45                | 17                  | 9.9365099       | 76.3118044       | 15-02-2020<br>10.39 |
| 13 | CS                            | 2.42              | 3.43             | 1.01                | 16                  | 9.9354901       | 76.314788        | 15-02-2020<br>10.27 |
| 14 | CS                            | 2.1               | 2.75             | 0.65                | 17                  | 9.9361539       | 76.3114425       | 15-02-2020<br>10.25 |
| 15 | CS                            | 1.5               | 2.31             | 0.81                | 18                  | 9.9361157       | 76.3270038       | 06-02-2020<br>10.48 |
| 16 | CS                            | 1.71              | 2.34             | 0.63                | 17                  | 9.9304168       | 76.3128902       | 06-02-2020<br>10.48 |
| 17 | CS                            | 1.7               | 2.5              | 0.8                 | 16                  | 9.9351017       | 76.314503        | 06-02-2020<br>10.28 |
| 18 | CS                            | 2.35              | 3.12             | 0.77                | 15                  | 9.9465058       | 76.3064828       | 06-02-2020<br>10.16 |
| 19 | CS                            | 1.96              | 2.7              | 0.74                | 15                  | 9.9356527       | 76.3151741       | 06-02-2020<br>10.06 |
| 20 | CS                            | 1.9               | 2.71             | 0.81                | 16                  | 9.9361539       | 76.3114425       | 06-02-2020<br>10.05 |
| 21 | CS                            | 2.25              | 3.2              | 0.95                | 15                  | 9.9361539       | 76.3114425       | 06-02-2020<br>9.58  |
| 22 | CS                            | 2.76              | 2.32             | -0.44               | 19                  | 9.935393        | 76.3149566       | 03-02-2020<br>13.09 |
| 23 | CS                            | 2.12              | 2.57             | 0.45                | 18                  | 9.935393        | 76.3149566       | 03-02-2020<br>13.03 |
| 24 | CS                            | 1.8               | 2.44             | 0.64                | 18                  | 9.935393        | 76.3149566       | 03-02-2020<br>12.54 |
| 25 | CS                            | 2.65              | 3.47             | 0.82                | 16                  | 9.9466613       | 76.306249        | 03-02-2020<br>12.41 |
| 26 | CS                            | 2.05              | 2.35             | 0.3                 | 20                  | 9.9361539       | 76.3114425       | 03-02-2020<br>12.25 |
| 27 | CS                            | 2.46              | 3.3              | 0.84                | 16                  | 9.9357122       | 76.3151429       | 03-02-2020<br>12.14 |

|    |    |      |      |      |    |           |            |                     |
|----|----|------|------|------|----|-----------|------------|---------------------|
| 28 | CS | 1.74 | 2.36 | 0.62 | 17 | 9.9333843 | 76.3186806 | 31-01-2020<br>15.46 |
| 29 | CS | 1.94 | 2.62 | 0.68 | 16 | 9.9305641 | 76.3187481 | 31-01-2020<br>15.41 |
| 30 | CS | 1.53 | 2.34 | 0.81 | 16 | 9.9353623 | 76.3151678 | 31-01-2020<br>15.29 |
| 31 | CS | 2.3  | 3.16 | 0.86 | 16 | 9.9456484 | 76.305445  | 31-01-2020<br>15.18 |
| 32 | CS | 1.95 | 2.72 | 0.77 | 16 | 9.9356035 | 76.3152228 | 31-01-2020<br>15.09 |
| 33 | CS | 1.76 | 2.35 | 0.59 | 18 | 9.9365439 | 76.3109018 | 31-01-2020<br>15.04 |
| 34 | CS | 2.27 | 3.27 | 1    | 15 | 9.9352538 | 76.314577  | 31-01-2020<br>14.55 |
| 35 | CS | 1.78 | 2.33 | 0.55 | 19 | 9.9361157 | 76.3270038 | 31-01-2020<br>11.43 |
| 36 | CS | 2    | 2.53 | 0.53 | 17 | 9.9335909 | 76.3237873 | 31-01-2020<br>11.32 |
| 37 | CS | 1.5  | 2.54 | 1.04 | 16 | 9.934883  | 76.3154663 | 31-01-2020<br>11.16 |
| 38 | CS | 2.56 | 3.2  | 0.64 | 16 | 9.9467059 | 76.3062717 | 31-01-2020<br>10.59 |
| 39 | CS | 2.12 | 2.5  | 0.38 | 16 | 9.9358    | 76.3151328 | 31-01-2020<br>10.49 |
| 40 | CS | 2.28 | 2.61 | 0.33 | 17 | 9.9365439 | 76.3109018 | 31-01-2020<br>10.42 |
| 41 | CS | 2.51 | 3.46 | 0.95 | 16 | 9.9354574 | 76.3148378 | 31-01-2020<br>10.32 |
| 42 | CS | 1.86 | 2.43 | 0.57 | 17 | 9.93564   | 76.3237469 | 27-01-2020<br>11.10 |
| 43 | CS | 1.73 | 2.3  | 0.57 | 17 | 9.9299237 | 76.3205791 | 27-01-2020<br>11.09 |
| 44 | CS | 1.61 | 2.4  | 0.79 | 16 | 9.935022  | 76.3143089 | 27-01-2020<br>10.56 |
| 45 | CS | 2.5  | 3.12 | 0.62 | 17 | 9.9465905 | 76.3065622 | 27-01-2020<br>10.47 |
| 46 | CS | 1.96 | 2.52 | 0.56 | 17 | 9.9346738 | 76.315895  | 27-01-2020<br>10.39 |
| 47 | CS | 1.85 | 2.29 | 0.44 | 19 | 9.9365249 | 76.3121663 | 27-01-2020<br>10.35 |
| 48 | CS | 2.41 | 3.15 | 0.74 | 16 | 9.9353706 | 76.3147498 | 27-01-2020<br>10.28 |
| 49 | CS | 1.83 | 2.45 | 0.62 | 18 | 9.9307461 | 76.3208519 | 26-01-2020<br>10.53 |
| 50 | CS | 1.75 | 3.33 | 1.58 | 17 | 9.9338599 | 76.318728  | 26-01-2020<br>10.47 |
| 51 | CS | 1.69 | 2.29 | 0.6  | 16 | 9.9347615 | 76.3150825 | 26-01-2020<br>10.37 |
| 52 | CS | 1.8  | 2.39 | 0.59 | 18 | 9.9365249 | 76.3121663 | 26-01-2020<br>10.37 |
| 53 | CS | 2.37 | 2.85 | 0.48 | 17 | 9.9465415 | 76.3063755 | 26-01-2020<br>10.29 |
| 54 | CS | 1.8  | 2.43 | 0.63 | 19 | 9.9290257 | 76.3149521 | 26-01-2020<br>10.16 |
| 55 | CS | 2.25 | 3.15 | 0.9  | 16 | 9.9356938 | 76.3151057 | 26-01-2020<br>10.11 |
| 56 | CS | 1.85 | 2.4  | 0.55 | 17 | 9.9361157 | 76.3270038 | 25-01-2020<br>9.13  |

|    |    |      |       |       |    |           |            |                     |
|----|----|------|-------|-------|----|-----------|------------|---------------------|
| 57 | CS | 2.94 | 2.7   | -0.24 | 17 | 9.9305238 | 76.3186539 | 25-01-2020<br>9.02  |
| 58 | CS | 1.61 | 2.24  | 0.63  | 17 | 9.9354388 | 76.3149904 | 25-01-2020<br>8.46  |
| 59 | CS | 2.34 | 2.99  | 0.65  | 17 | 9.9457336 | 76.3055497 | 25-01-2020<br>8.29  |
| 60 | CS | 1.96 | 2.57  | 0.61  | 18 | 9.9357008 | 76.3151684 | 25-01-2020<br>8.16  |
| 61 | CS | 1.81 | 2.49  | 0.68  | 17 | 9.9346738 | 76.315895  | 25-01-2020<br>8.09  |
| 62 | CS | 2.23 | 2.91  | 0.68  | 17 | 9.9356271 | 76.3150218 | 25-01-2020<br>8.00  |
| 63 | CS | 1.16 | 1.883 | 0.723 | 16 | 9.9361157 | 76.3270038 | 24-01-2020<br>9.10  |
| 64 | CS | 1.95 | 2.542 | 0.592 | 16 | 9.9303945 | 76.3191716 | 24-01-2020<br>8.58  |
| 65 | CS | 1.57 | 2.325 | 0.755 | 16 | 9.9343139 | 76.3159604 | 24-01-2020<br>8.42  |
| 66 | CS | 2.34 | 2.952 | 0.612 | 15 | 9.9466491 | 76.3065011 | 24-01-2020<br>8.28  |
| 67 | CS | 2.03 | 2.582 | 0.552 | 16 | 9.935739  | 76.3150116 | 24-01-2020<br>8.14  |
| 68 | CS | 1.8  | 2.415 | 0.615 | 16 | 9.9346738 | 76.315895  | 24-01-2020<br>8.05  |
| 69 | CS | 2.2  | 2.745 | 0.545 | 16 | 9.9352759 | 76.3146239 | 24-01-2020<br>7.53  |
| 70 | CS | 1.04 | 1.95  | 0.91  | 18 | 9.9361157 | 76.3270038 | 23-01-2020<br>8.01  |
| 71 | CS | 1.83 | 2.53  | 0.7   | 17 | 9.9338599 | 76.318728  | 23-01-2020<br>7.53  |
| 72 | CS | 1.44 | 2.12  | 0.68  | 17 | 9.9356235 | 76.3151367 | 23-01-2020<br>7.40  |
| 73 | CS | 2.27 | 3     | 0.73  | 17 | 9.9465242 | 76.3065022 | 23-01-2020<br>7.29  |
| 74 | CS | 1.92 | 2.5   | 0.58  | 17 | 9.9357212 | 76.3151675 | 23-01-2020<br>7.16  |
| 75 | CS | 1.68 | 2.02  | 0.34  | 17 | 9.9365399 | 76.3125283 | 23-01-2020<br>7.09  |
| 76 | CS | 2.11 | 2.86  | 0.75  | 17 | 9.9350881 | 76.3143237 | 23-01-2020<br>6.58  |
| 77 | CS | 1.67 | 2.18  | 0.51  | 19 | 9.9361007 | 76.3266419 | 22-01-2020<br>15.11 |
| 78 | CS | 2.05 | 2.5   | 0.45  | 19 | 9.9306026 | 76.318558  | 22-01-2020<br>14.58 |
| 79 | CS | 1.8  | 2.38  | 0.58  | 19 | 9.9353454 | 76.3153964 | 22-01-2020<br>14.44 |
| 80 | CS | 2.5  | 3.33  | 0.83  | 19 | 9.9465161 | 76.3064761 | 22-01-2020<br>14.23 |
| 81 | CS | 2.2  | 2.6   | 0.4   | 19 | 9.9346738 | 76.315895  | 22-01-2020<br>14.08 |
| 82 | CS | 2.3  | 2.39  | 0.09  | 20 | 9.9290257 | 76.3149521 | 22-01-2020<br>14.02 |
| 83 | CS | 2.43 | 3.12  | 0.69  | 19 | 9.9356846 | 76.3151351 | 22-01-2020<br>13.51 |
| 84 | CS | 1.94 | 2.344 | 0.404 | 20 | 9.934962  | 76.3156129 | 21-01-2020<br>15.38 |
| 85 | CS | 1.8  | 2.26  | 0.46  | 20 | 9.9299237 | 76.3205791 | 21-01-2020<br>15.05 |

|    |    |      |       |       |    |           |            |                     |
|----|----|------|-------|-------|----|-----------|------------|---------------------|
| 86 | CS | 2.15 | 2.55  | 0.4   | 19 | 9.9338599 | 76.318728  | 21-01-2020<br>14.57 |
| 87 | CS | 2.35 | 2.62  | 0.27  | 20 | 9.9358318 | 76.3151005 | 21-01-2020<br>14.29 |
| 88 | CS | 2.19 | 2.53  | 0.34  | 20 | 9.9173445 | 76.3172769 | 21-01-2020<br>14.21 |
| 89 | CS | 2.58 | 3.23  | 0.65  | 17 | 9.9353114 | 76.3145814 | 21-01-2020<br>14.07 |
| 90 | CS | 1.91 | 2.42  | 0.51  | 21 | 9.9361007 | 76.3266419 | 20-01-2020<br>15.22 |
| 91 | CS | 2.26 | 2.72  | 0.46  | 20 | 9.9297504 | 76.3227674 | 20-01-2020<br>15.03 |
| 92 | CS | 1.9  | 2.44  | 0.54  | 20 | 9.9353093 | 76.3152339 | 20-01-2020<br>14.30 |
| 93 | CS | 2.35 | 2.82  | 0.47  | 20 | 9.9358703 | 76.3149041 | 20-01-2020<br>14.16 |
| 94 | CS | 2.14 | 2.59  | 0.45  | 20 | 9.9364949 | 76.3114425 | 20-01-2020<br>14.03 |
| 95 | CS | 2.49 | 3.27  | 0.78  | 18 | 9.9350831 | 76.3142854 | 20-01-2020<br>13.52 |
| 96 | CS | 2.15 | 2.315 | 0.165 | 17 | 9.9365439 | 76.3109018 | 18-01-2020<br>15.13 |
